# Supplementary material for: COVID-19 Aftermath: Exploring the Mental Health Emergency among Students at a Northern Italian University
Source: MDPI journal article supplement (doi:10.3390/ijerph19148587), 2022-07-14
Supplement: s1 [file s1]

**Figure S1.** Heatmap of the loadings estimated by the factor analysis. Values below 0.31 were set to 0. The factors represented on the y-axis are: F1=having had relatives positive to COVID-19, with symptoms or deceased; F2=videogames usage; F3=sleep quality, mnemonic difficulties and performance reduction; F4=TV usage; F5=lockdown conditions; F6=phone usage; F7=having been positive or with COVID-19 symptoms; F8=PC usage; F9=nutrition, weight change and physical activity; F10=unemployed cohabitants during lockdown; F11=smoking and alcohol habit. The variables displayed on the x-axis are: V1=number of rooms in the house; V2=private garden availability; V3=cohabitants; V4=average hours spent outside; V5=average hours spent using phone; V6=change in time using phone; V7=average hours spent using PC; V8=change in time using PC; V9=average hours spent playing videogames; V10=change in time playing videogames; V11=average hours spent using TV; V12=change in time using TV; V13=smoking status during lockdown; V14=alcohol consumption during lockdown; V15=physical activity; V16=usual sleep quality; V17=lockdown sleep quality; V18=change in weight; V19=change in nutrition; V20=have been positive to COVID-19; V21=COVID-19 symptoms; V22=relatives positive to COVID-19; V23=relatives with COVID-19 symptoms; V24=relatives died for COVID-19; V25=cohabitants unemployed during lockdown; V26=mnemonic difficulties; V27=performance reduction.

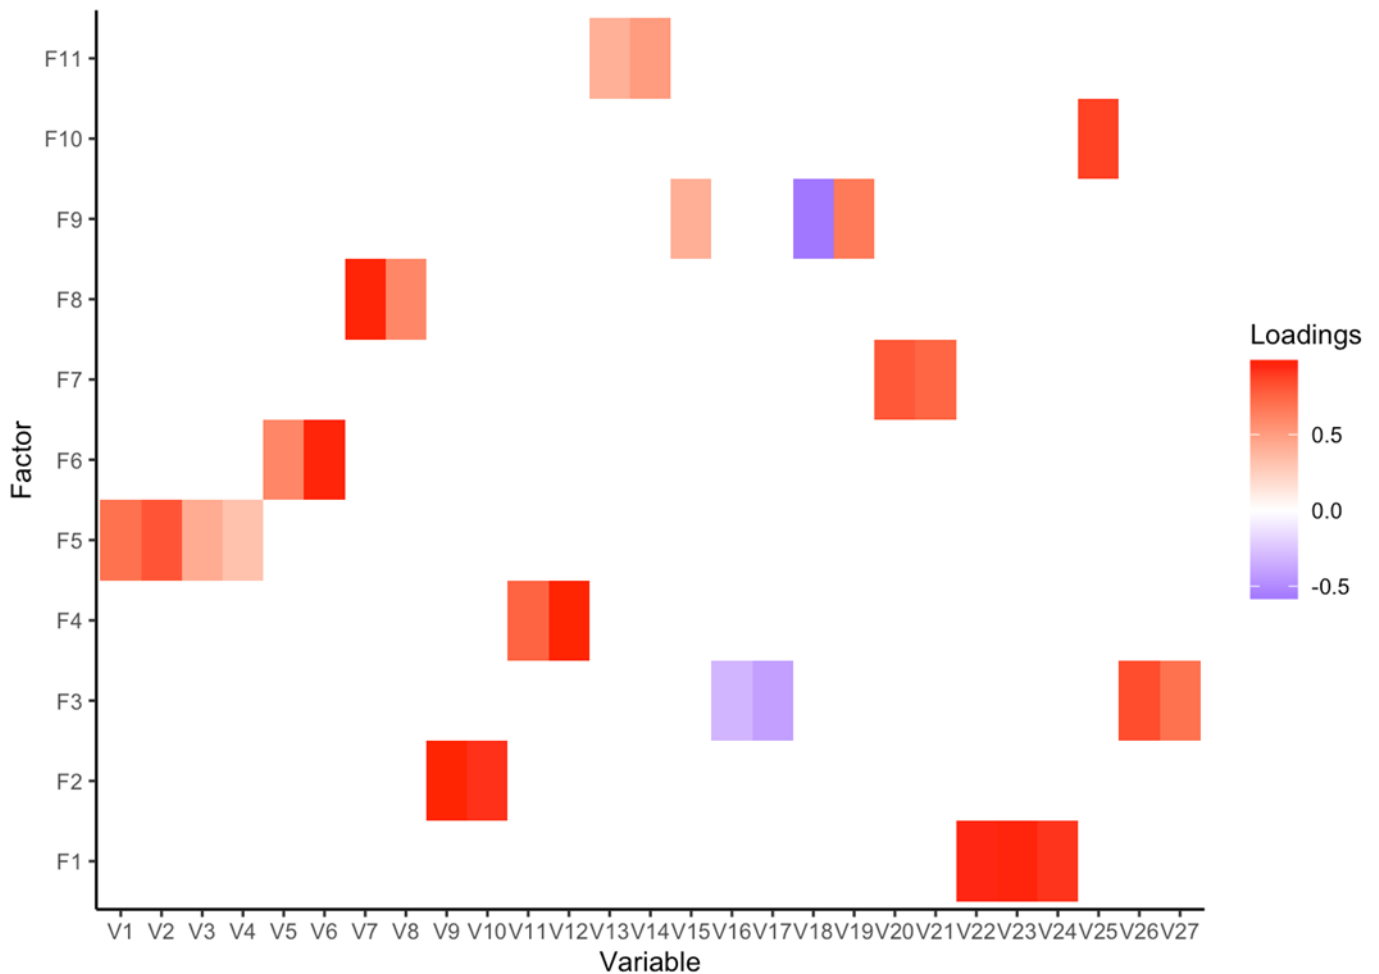

**Table S1.** Descriptive statistics of the overall 3,533 participants to the survey.

| DEMOGRAPHIC INFORMATION                    | N (3533)          |
|--------------------------------------------|-------------------|
| Province                                   |                   |
| Altro                                      | 536 (15.2%)       |
| Bergamo (BG)                               | 324 (9.2%)        |
| Brescia (BS)                               | 2673 (75.7%)      |
| ACADEMIC AREA                              |                   |
| Medical Science                            | 1389 (39.3%)      |
| Engineering                                | 1096 (31.0%)      |
| Economy                                    | 718 (20.3%)       |
| Law                                        | 310 (8.8%)        |
| Others                                     | 20 (0.6%)         |
| CONDITION OF SOCIAL ISOLATION              |                   |
| Isolation length categories                |                   |
| Low                                        | 1372 (39.2%)      |
| Medium                                     | 1020 (29.2%)      |
| High                                       | 1107 (31.6%)      |
| LIFESTYLES                                 |                   |
| BMI                                        |                   |
| Median (Q1, Q3)                            | 21.7 (19.8, 23.7) |
| PRODUCTIVITY                               |                   |
| Working in addition to studying            |                   |
| Never worked before                        | 2290 (64.8%)      |
| No                                         | 785 (22.2%)       |
| Yes                                        | 458 (13.0%)       |
| Keep studying next semesters               |                   |
| Yes                                        | 3411 (96.5%)      |
| No, for other reasons                      | 89 (2.5%)         |
| No, for pandemic related reasons           | 33 (0.9%)         |
| Job found during lockdown                  |                   |
| No                                         | 2237 (97.9%)      |
| Yes                                        | 49 (2.1%)         |
| Cohabitants working previous to lockdown   |                   |
| 0                                          | 250 (7.1%)        |
| 1                                          | 1122 (31.8%)      |
| 2                                          | 1641 (46.4%)      |
| $\geq 3$                                   | 520 (14.7%)       |
| Cohabitants kept on working also from home |                   |
| 0                                          | 961 (27.2%)       |
| 1                                          | 1485 (42.0%)      |
| 2                                          | 917 (26.0%)       |
| $\geq 3$                                   | 170 (4.8%)        |

Prefer online lessons compared to live lessons

|     |              |
|-----|--------------|
| No  | 2363 (66.9%) |
| Yes | 1170 (33.1%) |

---
